# Supplementary material
Source: PubMed Central journal article supplement (PMC9131494)
Supplement: sj-pdf-1-ine-10.1177_15910199211019176.pdf [file sj-pdf-1-ine-10.1177_15910199211019176.pdf]

## Supplementary Materials

**Table 1.** Radiomics features.

|                                                                                                                                                                                                                                                                                                                                                                                                                                                                                     |
|-------------------------------------------------------------------------------------------------------------------------------------------------------------------------------------------------------------------------------------------------------------------------------------------------------------------------------------------------------------------------------------------------------------------------------------------------------------------------------------|
| <b>Histogram</b><br><br>Skewness<br><br>Kurtosis<br><br>Excess kurtosis<br><br>Entropy-log10<br><br>Entropy-log2<br><br>Energy (uniformity)                                                                                                                                                                                                                                                                                                                                         |
| <b>GLCM (gray-level co-occurrence matrix)</b><br><br>Homogeneity (inverse difference)<br><br>Energy (angular second moment)<br><br>Contrast (variance)<br><br>Correlation<br><br>Entropy-log10<br><br>Entropy-log2 (joint entropy)<br><br>Dissimilarity                                                                                                                                                                                                                             |
| <b>GLRLM (gray-level run-length matrix)</b><br><br>SRE (short-run emphasis)<br><br>LRE (long-run emphasis)<br><br>LGRE (low gray-level run emphasis)<br><br>HGRE (high gray-level run emphasis)<br><br>SRLGE (short-run low gray-level emphasis)<br><br>SRHGE (short-run high gray-level emphasis)<br><br>LRLGE (long-run low gray-level emphasis)<br><br>LRHGE (long-run high gray-level emphasis)<br><br>GLNU (gray-level non-uniformity)<br><br>RLNU (run length non-uniformity) |

|                                                                                                                                                                                                                                                                                                                                                                                                                                                                                                                           |
|---------------------------------------------------------------------------------------------------------------------------------------------------------------------------------------------------------------------------------------------------------------------------------------------------------------------------------------------------------------------------------------------------------------------------------------------------------------------------------------------------------------------------|
| RP (run percentage)                                                                                                                                                                                                                                                                                                                                                                                                                                                                                                       |
| <b>NGLDM (neighborhood gray-level difference matrix)</b><br><br>Coarseness<br><br>Contrast<br><br>Busyness                                                                                                                                                                                                                                                                                                                                                                                                                |
| <b>GLZLM (gray-level zone length matrix)</b><br><br>SZE (short-zone emphasis)<br><br>LZE (long-zone emphasis)<br><br>LGZE (low gray-level zone emphasis)<br><br>HGZE (high gray-level zone emphasis)<br><br>SZLGE (short-zone low gray-level emphasis)<br><br>SZHGE (short-zone high gray-level emphasis)<br><br>LZLGE (long-zone low gray-level emphasis)<br><br>LZHGE (long-zone high gray-level emphasis)<br><br>GLNU (gray-level non-uniformity)<br><br>ZLNU (zone length non-uniformity)<br><br>ZP (zone percentage) |
| <b>Conventional indices</b><br><br>Q1 (the first quartile)<br><br>Q2 (the second quartile)<br><br>Q3 (the third quartile)<br><br>Min (minimum)<br><br>Mean<br><br>Std (standard deviation)<br><br>Max (maximum)                                                                                                                                                                                                                                                                                                           |
| <b>Shape features</b><br><br>Volume (mL)<br><br>Volume (voxels)                                                                                                                                                                                                                                                                                                                                                                                                                                                           |

Detailed information about the features can be found on the website of the software ([www.lifexsoft.org](http://www.lifexsoft.org)).

**Table 2.** Interobserver reproducibility.

| <b>Texture features</b> | <b>ICC</b> | <b>95% CI</b> | <b>P value</b> |
|-------------------------|------------|---------------|----------------|
| <b>Histogram</b>        |            |               |                |
| Skewness                | 0.812      | 0.788 – 0.941 | < 0.001        |
| Kurtosis                | 0.917      | 0.854 – 0.955 | < 0.001        |
| Excess kurtosis         | 0.622      | 0.743 – 0.989 | < 0.001        |
| Entropy-log10           | 0.765      | 0.811 – 0.976 | < 0.001        |
| Entropy-log2            | 0.689      | 0.675 – 0.936 | < 0.001        |
| Energy                  | 0.923      | 0.889 – 0.957 | < 0.001        |
| <b>GLCM</b>             |            |               |                |
| Homogeneity             | 0.701      | 0.721 – 0.989 | < 0.001        |
| Energy                  | 0.824      | 0.855 – 0.976 | < 0.001        |
| Contrast                | 0.766      | 0.711 – 0.923 | < 0.001        |
| Correlation             | 0.814      | 0.845 – 0.954 | < 0.001        |
| Entropy-log10           | 0.699      | 0.769 – 0.918 | < 0.001        |
| Entropy-log2            | 0.896      | 0.866 – 0.953 | < 0.001        |
| Dissimilarity           | 0.901      | 0.871 – 0.946 | < 0.001        |
| <b>GLRLM</b>            |            |               |                |
| SRE                     | 0.834      | 0.785 – 0.911 | < 0.001        |
| LRE                     | 0.866      | 0.805 – 0.942 | < 0.001        |
| LGRE                    | 0.902      | 0.853 – 0.957 | < 0.001        |
| HGRE                    | 0.833      | 0.763 – 0.952 | < 0.001        |
| SRLGE                   | 0.741      | 0.707 – 0.854 | < 0.001        |
| SRHGE                   | 0.852      | 0.874 – 0.942 | < 0.001        |
| LRLGE                   | 0.882      | 0.824 – 0.957 | < 0.001        |

|                             |       |               |         |
|-----------------------------|-------|---------------|---------|
| LRHGE                       | 0.865 | 0.813 – 0.968 | < 0.001 |
| GLNU                        | 0.678 | 0.746 – 0.895 | < 0.001 |
| RLNU                        | 0.815 | 0.723 – 0.914 | < 0.001 |
| RP                          | 0.932 | 0.875 – 0.953 | < 0.001 |
| <b>NGLDM</b>                |       |               |         |
| Coarseness                  | 0.746 | 0.772 – 0.882 | < 0.001 |
| Contrast                    | 0.814 | 0.782 – 0.965 | < 0.001 |
| Busyness                    | 0.894 | 0.861 – 0.972 | < 0.001 |
| <b>GLZLM</b>                |       |               |         |
| SZE                         | 0.843 | 0.723 – 0.889 | < 0.001 |
| LZE                         | 0.914 | 0.853 – 0.956 | < 0.001 |
| LGZE                        | 0.744 | 0.769 – 0.934 | < 0.001 |
| HGZE                        | 0.839 | 0.684 – 0.920 | < 0.001 |
| SZLGE                       | 0.782 | 0.630 – 0.874 | < 0.001 |
| SZHGE                       | 0.834 | 0.696 – 0.912 | < 0.001 |
| LZLGE                       | 0.851 | 0.783 – 0.856 | < 0.001 |
| LZHGE                       | 0.928 | 0.884 – 0.947 | < 0.001 |
| GLNU                        | 0.863 | 0.671 – 0.836 | < 0.001 |
| ZLNU                        | 0.910 | 0.830 – 0.904 | < 0.001 |
| ZP                          | 0.913 | 0.793 – 0.901 | < 0.001 |
| <b>Conventional indices</b> |       |               |         |
| Q1                          | 0.765 | 0.657 – 0.847 | < 0.001 |
| Q2                          | 0.815 | 0.790 – 0.939 | < 0.001 |
| Q3                          | 0.839 | 0.795 – 0.965 | < 0.001 |
| Min                         | 0.943 | 0.876 – 0.953 | < 0.001 |
| Mean                        | 0.890 | 0.759 – 0.945 | < 0.001 |
| Std                         | 0.781 | 0.665 – 0.890 | < 0.001 |
| Max                         | 0.905 | 0.856 – 0.936 | < 0.001 |

| <b>Shape features</b> |       |               |         |
|-----------------------|-------|---------------|---------|
| Volume (mL)           | 0.824 | 0.813 – 0.965 | < 0.001 |
| Volume (voxels)       | 0.902 | 0.811 – 0.925 | < 0.001 |

ICC = intraclass correlation coefficient, CI = confidence interval, GLCM = gray-level co-occurrence matrix, GLRLM = gray-level run-length matrix, SRE = short-run emphasis, LRE = long-run emphasis, LGRE = low gray-level run emphasis, HGRE = high gray-level run emphasis, SRLGE = short-run low gray-level emphasis, SRHGE = short-run high gray-level emphasis, LRLGE = long-run low gray-level emphasis, LRHGE = long-run high gray-level emphasis, GLNU = gray-level non-uniformity, RLNU = run length non-uniformity, RP = run percentage, NGLDM = neighborhood gray-level difference matrix, GLZLM = gray-level zone length matrix, SZE = short-zone emphasis, LZE = long-zone emphasis, LGZE = low gray-level zone emphasis, HGZE = high gray-level zone emphasis, SZLGE = short-zone low gray-level emphasis, SZHGE = short-zone high gray-level emphasis, LZLGE = long-zone low gray-level emphasis, LZHGE = long-zone high gray-level emphasis, ZLNU = zone length non-uniformity, ZP = zone percentage, Q1 = the first quartile, Q2 = the second quartile, Q3 = the third quartile, Min = minimum, Std = standard deviation, Max = maximum.
